# Supplementary material for: Rational design, characterization and catalytic application of metal clusters functionalized with hydrophilic, chiral ligands: a proof of principle study
Source: Royal Society of Chemistry journal article supplement (doi:10.1039/c3cp53626b), 2013-01-01
Supplement: c3cp53626b.pdf [file c3cp53626b.pdf]

## Supplementary Information

### **Rational design, characterization and catalytic application of metal clusters functionalized with hydrophilic, chiral ligands: a proof of principle study**

Sebastian Kunz\*, Patrick Schreiber, Martin Ludwig, Mark M. Maturi, Olaf Ackermann, Martin Tschurl  
and Ueli Heiz

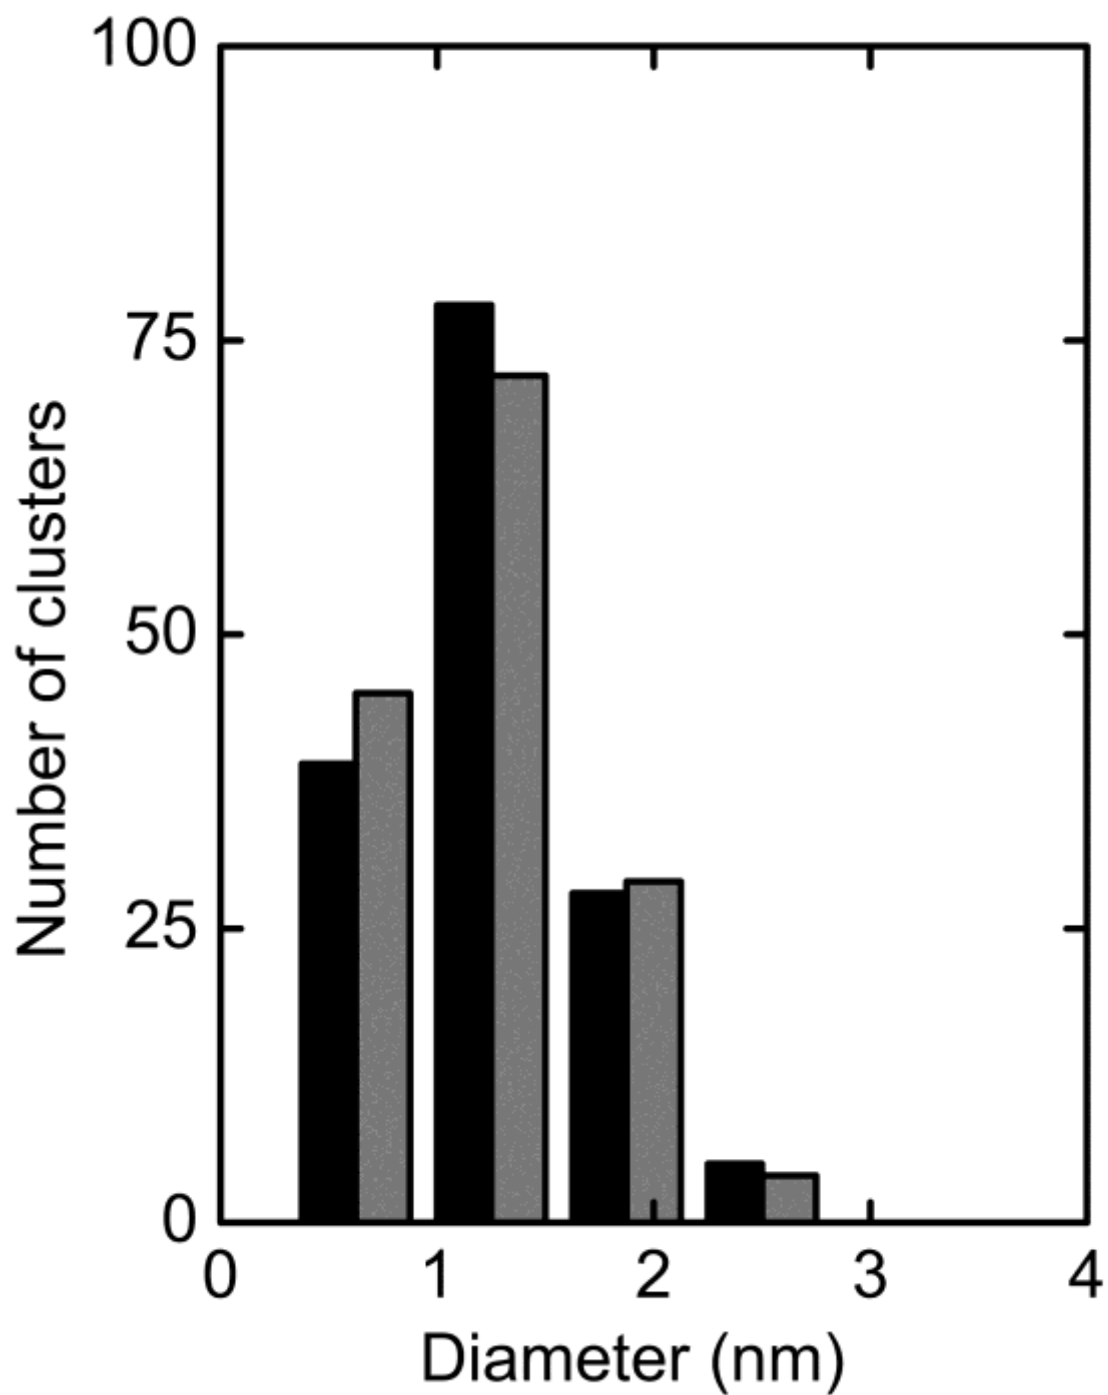

**Figure S1.** Particle size distributions of CYS-functionalized clusters (grey bars) prepared from “unprotected” Pt clusters (black bars). The statistics clearly show that cluster size is preserved after functionalization. In addition, no agglomerates of clusters are found.

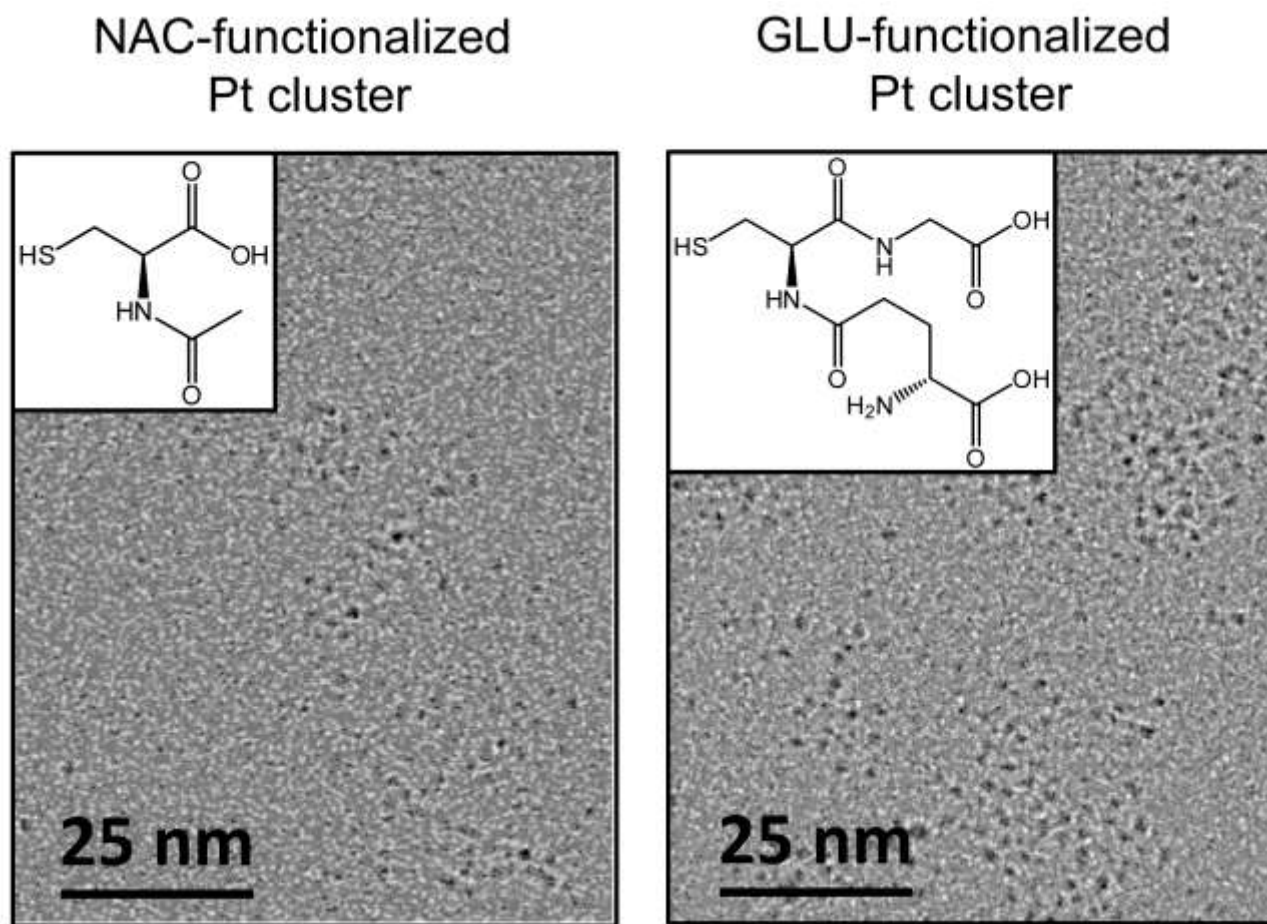

**Figure S2.** TEM images of NAC- and GLU-functionalized clusters, prepared from the same “unprotected” cluster batch as the CYS-clusters.

| 43 MMMPC10                      |                          |                   |          |
|---------------------------------|--------------------------|-------------------|----------|
| Daicel Chiralcel, OJ-H, 250x4.6 |                          |                   |          |
| Sample Name:                    | MMMPC10                  | Injection Volume: | 50,0     |
| Vial Number:                    | GB11                     | Channel:          | UV_VIS_1 |
| Sample Type:                    | unknown                  | Wavelength:       | 210      |
| Control Program:                | Säule5_NP_ISO_90_10_1_50 | Bandwidth:        | 1        |
| Quantif. Method:                | gradA                    | Dilution Factor:  | 1,0000   |
| Recording Time:                 | 16.11.2012 15:05         | Sample Weight:    | 1,0000   |
| Run Time (min):                 | 50,00                    | Sample Amount:    | 1,0000   |

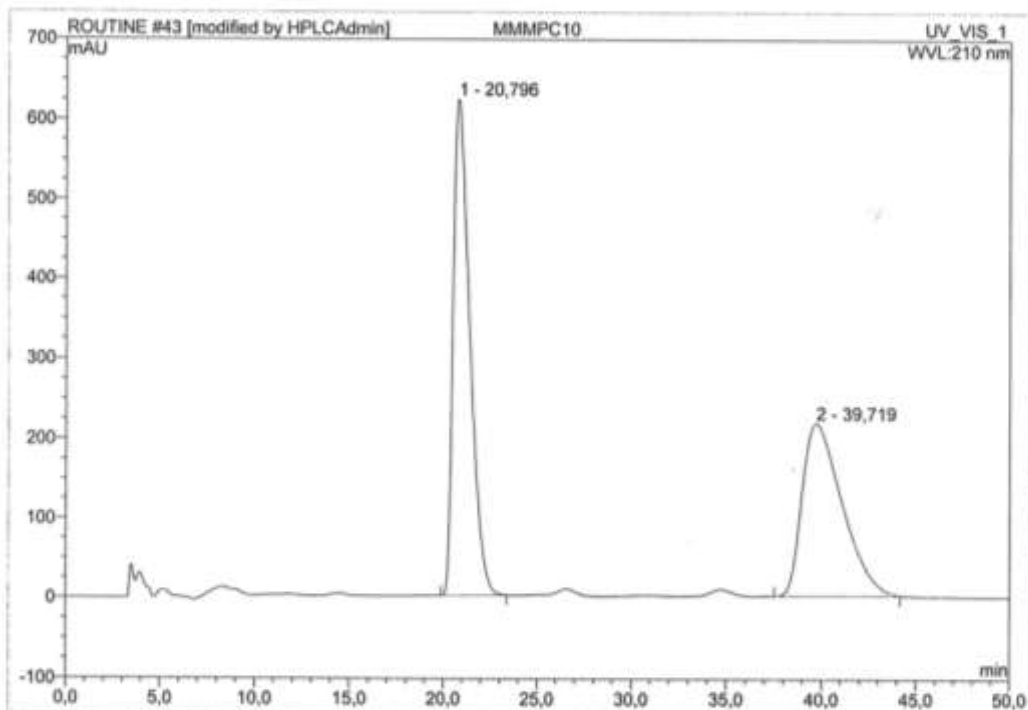

| No.           | Ret.Time<br>min | Peak Name | Height<br>mAU | Area<br>mAU*min | Rel.Area<br>% | Amount | Type |
|---------------|-----------------|-----------|---------------|-----------------|---------------|--------|------|
| 1             | 20,80           | n.a.      | 621,586       | 640,851         | 54,69         | n.a.   | BMB  |
| 2             | 39,72           | n.a.      | 217,043       | 530,937         | 45,31         | n.a.   | BMB* |
| <b>Total:</b> |                 |           | 838,628       | 1171,788        | 100,00        | 0,000  |      |

**Figure S3.** Representative HPLC chromatogram of derivatized reaction product from catalytic investigations of CYS-functionalized clusters.

| 11 MMMPC12                     |                          |                   |          |
|--------------------------------|--------------------------|-------------------|----------|
| Daicel Chiralcel OJ-H, 250x4.6 |                          |                   |          |
| Sample Name:                   | MMMPC12                  | Injection Volume: | 50,0     |
| Vial Number:                   | GA9                      | Channel:          | UV_VIS_1 |
| Sample Type:                   | unknown                  | Wavelength:       | 210      |
| Control Program:               | Säule5_NP_ISO_90_10_1_50 | Bandwidth:        | 1        |
| Quantif. Method:               | gradA                    | Dilution Factor:  | 1,0000   |
| Recording Time:                | 27.11.2012 10:21         | Sample Weight:    | 1,0000   |
| Run Time (min):                | 50,00                    | Sample Amount:    | 1,0000   |

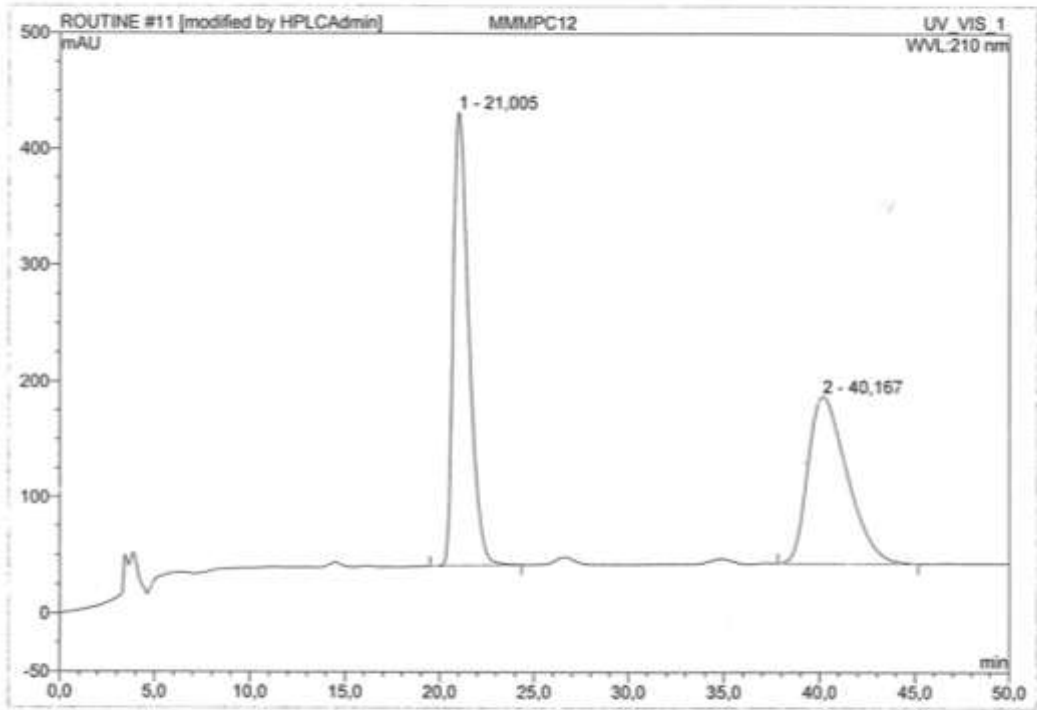

| No.           | Ret.Time min | Peak Name | Height mAU | Area mAU*min | Rel.Area % | Amount | Type |
|---------------|--------------|-----------|------------|--------------|------------|--------|------|
| 1             | 21,01        | n.a.      | 390,632    | 379,667      | 52,48      | n.a.   | BMB* |
| 2             | 40,17        | n.a.      | 144,270    | 343,726      | 47,52      | n.a.   | BMB* |
| <b>Total:</b> |              |           | 534,902    | 723,394      | 100,00     | 0,000  |      |

default/integration

Chromeleon (c) Dionex 1996-2006  
 Version 6.80 SP1 Build 2238

**Figure S4.** Representative HPCL chromatogram of derivatized reaction product from catalytic investigations of GLU-functionalized clusters.

|                                        |                          |                   |          |
|----------------------------------------|--------------------------|-------------------|----------|
| <b>8 MMMPC11</b>                       |                          |                   |          |
| <b>Daicel Chiralcel, OJ-H, 250x4.6</b> |                          |                   |          |
| Sample Name:                           | MMMPC11                  | Injection Volume: | 50,0     |
| Vial Number:                           | GA12                     | Channel:          | UV_VIS_2 |
| Sample Type:                           | unknown                  | Wavelength:       | 254      |
| Control Program:                       | Säule5_NP_ISO_90_10_1_50 | Bandwidth:        | 1        |
| Quantif. Method:                       | gradA                    | Dilution Factor:  | 1,0000   |
| Recording Time:                        | 22.11.2012 17:28         | Sample Weight:    | 1,0000   |
| Run Time (min):                        | 50,00                    | Sample Amount:    | 1,0000   |

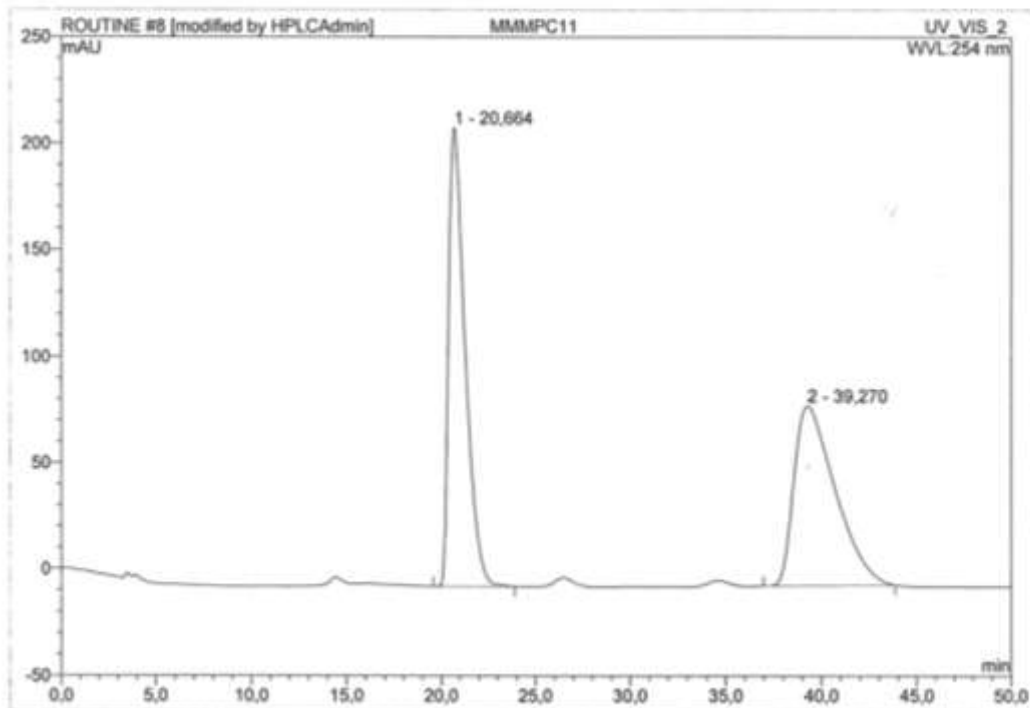

| No.           | Ret.Time<br>min | Peak Name | Height<br>mAU | Area<br>mAU*min | Rel.Area<br>% | Amount | Type |
|---------------|-----------------|-----------|---------------|-----------------|---------------|--------|------|
| 1             | 20,66           | n.a.      | 215,575       | 219,108         | 50,93         | n.a.   | BMB  |
| 2             | 39,27           | n.a.      | 84,601        | 211,075         | 49,07         | n.a.   | BMB* |
| <b>Total:</b> |                 |           | 300,176       | 430,183         | 100,00        | 0,000  |      |

**Figure S5.** Representative HPLC chromatogram of derivatized reaction product from catalytic investigations of NAC-functionalized clusters.

**Table S1.** Number of ligands per Pt atom and per Pt surface atom for all three ligand-functionalized clusters. The ligand (determined by EA) to Pt (determined by AAS) ratio was calculated by using the sulfur content for estimation of the number of ligands within the sample. Based on the dispersion of the metal cluster, estimated as described within the article (see 3. Results and Discussion), the ligand coverage was calculated under the assumption that a full monolayer consists of one ligand per Pt surface atom.

| <b>Ligand</b> | <b>Ligands<br/>/ Pt<sub>atom</sub></b> | <b>Ligands<br/>/ Pt<sub>surface atom</sub></b> |
|---------------|----------------------------------------|------------------------------------------------|
| CYS           | 0.57                                   | 0.60                                           |
| NAC           | 0.57                                   | 0.60                                           |
| GLU           | 0.44                                   | 0.46                                           |
